# Supplementary material for: Structural investigation of thermo-responsive poly(2-isopropyl-2-oxazoline) hydrogel across the volume phase transition
Source: Royal Society of Chemistry journal article supplement (doi:10.1039/c4sm02812k), 2015-01-01
Supplement: c4sm02812k1.pdf [file c4sm02812k1.pdf]

## Supporting Information to

# Structural Investigation on Thermo-responsive Poly(2-isopropyl-2-oxazoline) Hydrogel across the Volume Phase Transition

*Tianjiao Li, Hui Tang, Peiyi Wu\**

The State Key Laboratory of Molecular Engineering of Polymers and Department of Macromolecular Science, Laboratory of Advanced Materials, Fudan University, Shanghai 200433, People's Republic of China.

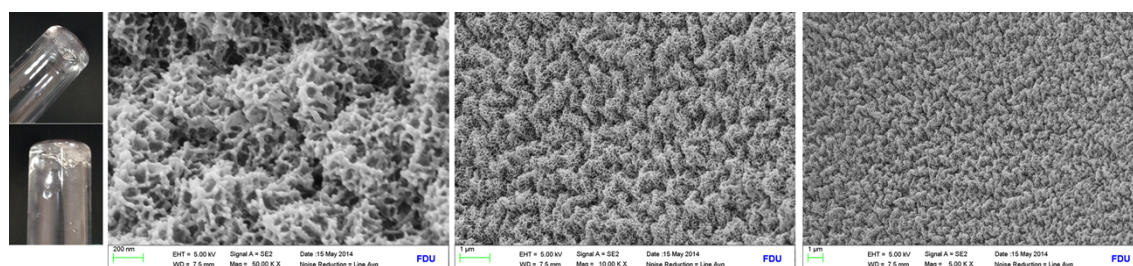

**Fig. S1** FE-SEM micrographs of freeze-dried PIPOZ hydrogel with the pictures of fresh PIPOZ hydrogel in the vials.

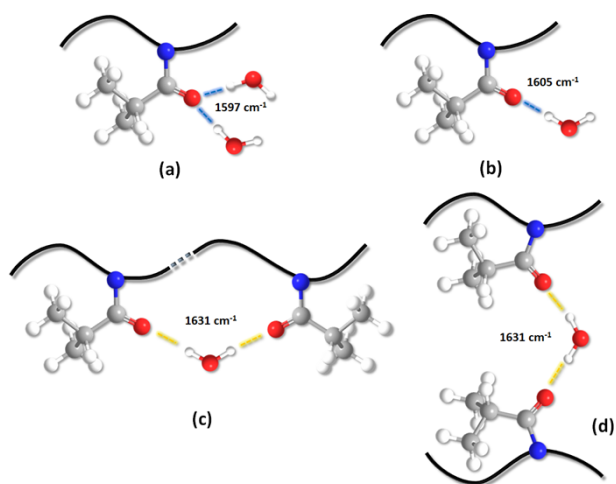

**Fig. S2** Proposed structures of PIPOZ C=O units with D<sub>2</sub>O molecules and their tentative band assignments in PIPOZ aqueous solution.

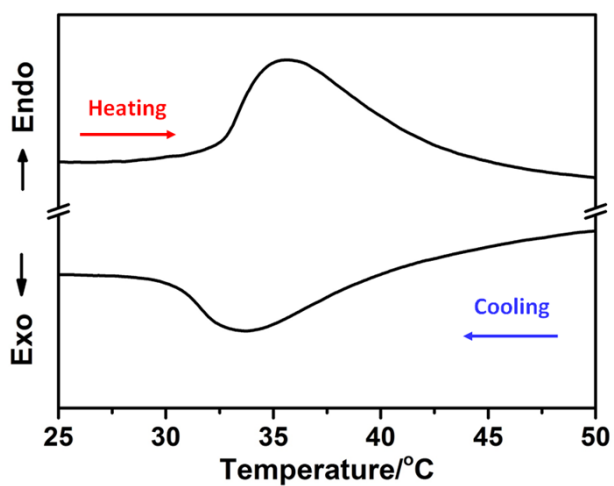

**Fig. S3** DSC curves of PIPOZ-PBO hydrogel in D<sub>2</sub>O upon heating and cooling at a rate of 1 °C min<sup>-1</sup>.
